# Supplementary material for: Chest radiograph-based artificial intelligence predictive model for mortality in community-acquired pneumonia
Source: HighWire-hosted journal article supplement (doi:10.1136/bmjresp-2021-001045), 2021-08-01
Supplement: bmjresp-2021-001045supp001_data_supplement.pdf [file bmjresp-2021-001045supp001_data_supplement.pdf]

**Supplementary Figure 1: Calibration plots in the prospective dataset.**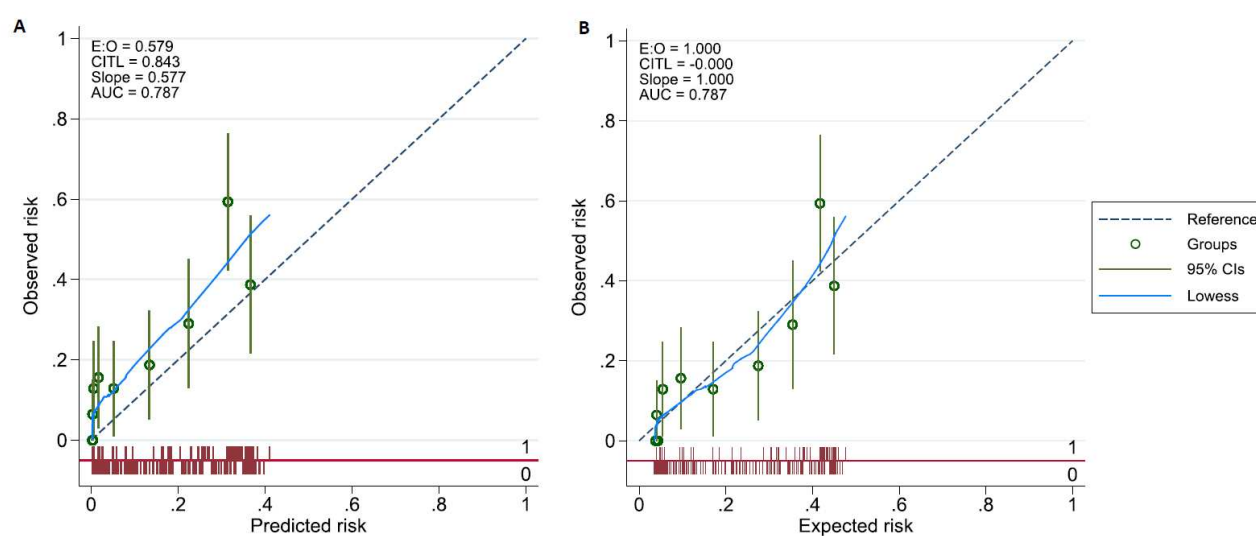

(A) Calibration plot with locally weighted scatterplot smoothing (LOWESS) for CAPE<sup>®</sup> mortality risk score (outcome: 30-day mortality) in the prospective dataset.

(B) Calibration plot for CAPE<sup>®</sup> mortality risk score (outcome: 30-day mortality) in the prospective dataset after recalibration by using the linear predictor in the original model as the only covariable (logistic calibration).

AUC=Area under the receiver operating characteristic curve. CI=Confidence interval. CITL: Calibration-in-the-large. E:O= Expected: Observed.
