# Supplementary material for: Chest radiograph-based artificial intelligence predictive model for mortality in community-acquired pneumonia
Source: HighWire-hosted journal article supplement (doi:10.1136/bmjresp-2021-001045), 2021-08-01
Supplement: bmjresp-2021-001045supp002_data_supplement.pdf [file bmjresp-2021-001045supp002_data_supplement.pdf]

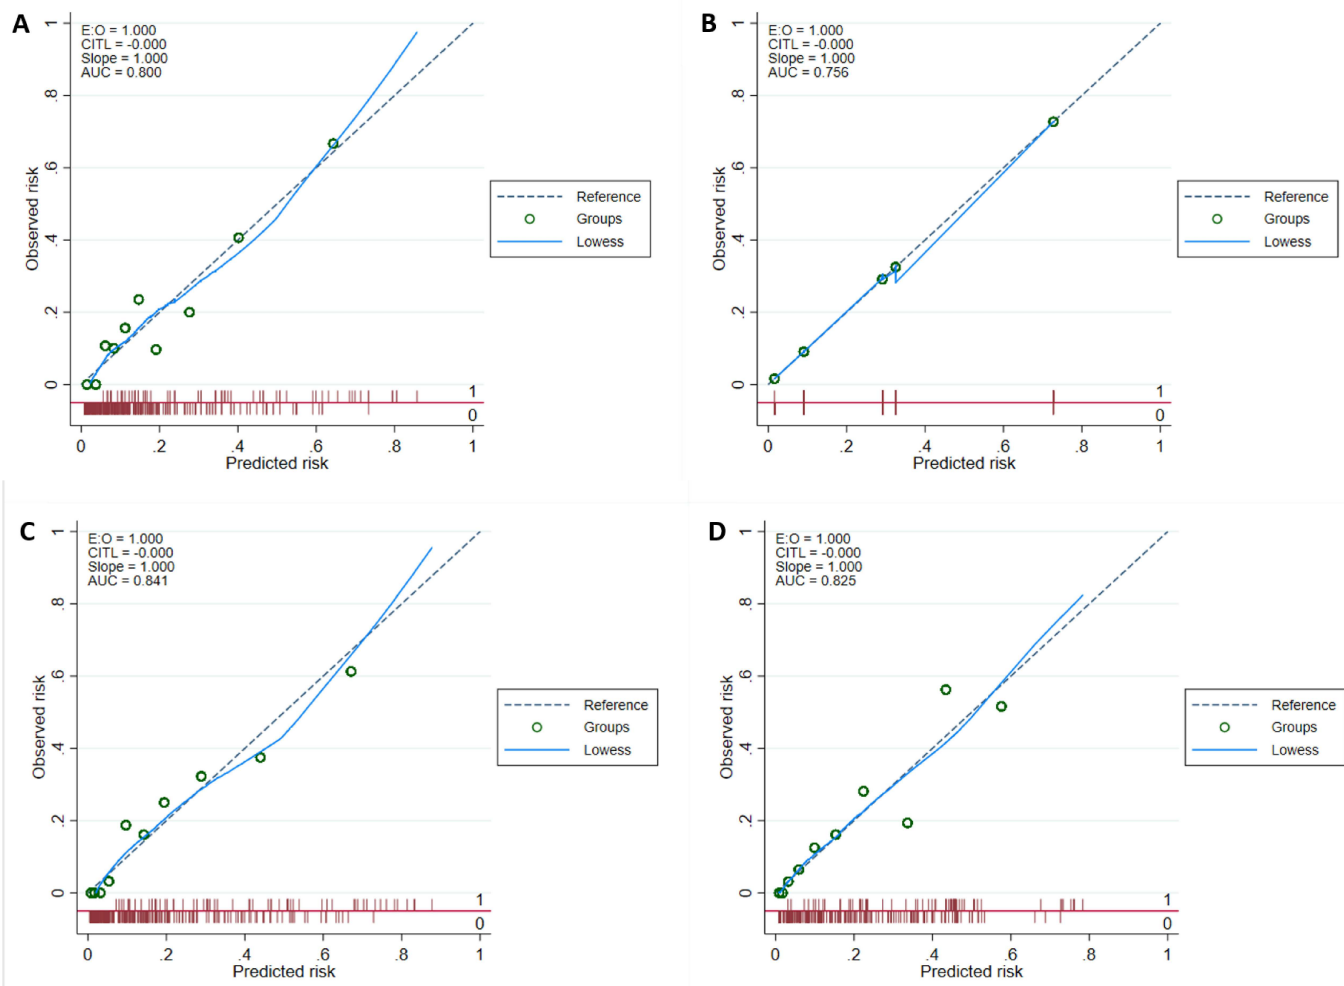

### Supplementary Figure 2. Calibration plots in the prospective dataset.

Calibration plot with LOWESS for (A) PSI, (B) CURB-65, (C) CAPE+PSI, and (D) CAPE+CURB-65. AUC=Area under the receiver operating characteristic curve. CI=Confidence interval. CITL: Calibration-in-the-large. E:O=Expected:Observed.
