# Supplementary material for: Chest radiograph-based artificial intelligence predictive model for mortality in community-acquired pneumonia
Source: HighWire-hosted journal article supplement (doi:10.1136/bmjresp-2021-001045), 2021-08-01
Supplement: bmjresp-2021-001045supp003_data_supplement.pdf [file bmjresp-2021-001045supp003_data_supplement.pdf]

**Supplementary Table 1a. Reclassification table for PSI and CAPE<sup>®</sup>+PSI at a 30-day mortality risk threshold of 0.20.**

| PSI        | Survivors (n=61)       |            | Total |
|------------|------------------------|------------|-------|
|            | CAPE <sup>®</sup> +PSI |            |       |
|            | <0.20 risk             | ≥0.20 risk |       |
| <0.20 risk | 13                     | 8          | 21    |
| ≥0.20 risk | 4                      | 36         | 40    |
| Total      | 17                     | 44         | 61    |

  

| PSI        | Non-survivors (n=254)  |            | Total |
|------------|------------------------|------------|-------|
|            | CAPE <sup>®</sup> +PSI |            |       |
|            | <0.20 risk             | ≥0.20 risk |       |
| <0.20 risk | 169                    | 26         | 195   |
| ≥0.20 risk | 21                     | 38         | 59    |
| Total      | 190                    | 64         | 254   |

CAPE<sup>®</sup>=Community-acquired pneumonia Artificial intelligence Predictive Engine.

PSI=Pneumonia Severity Index.

Net reclassification index (NRI) for addition of CAPE to PSI:  $(8-4)/61 - (26-21)/254 = 4.6\%$  (95%CI, 3.9%-5.3%).

**Supplementary Table 1b. Reclassification table for CURB-65 and CAPE+CURB-65 at a 30-day mortality risk threshold of 20%.**

| CURB-65    | Survivors (n=61)           |            | Total |
|------------|----------------------------|------------|-------|
|            | CAPE <sup>®</sup> +CURB-65 |            |       |
|            | <0.20 risk                 | ≥0.20 risk |       |
| <0.20 risk | 5                          | 5          | 10    |
| ≥0.20 risk | 9                          | 42         | 51    |
| Total      | 14                         | 47         | 61    |

  

| CURB-65    | Non-survivors (n=254)      |            | Total |
|------------|----------------------------|------------|-------|
|            | CAPE <sup>®</sup> +CURB-65 |            |       |
|            | <0.20 risk                 | ≥0.20 risk |       |
| <0.20 risk | 141                        | 10         | 151   |
| ≥0.20 risk | 38                         | 65         | 103   |
| Total      | 179                        | 75         | 254   |

CAPE<sup>®</sup>=Community-acquired pneumonia Artificial intelligence Predictive Engine.

CURB-65: Confusion of new onset, blood Urea nitrogen, Respiratory rate, Blood pressure, 65 years old.

Net reclassification index (NRI) for addition of CAPE to CURB-65:  $(5-9)/61 - (10-38)/254 = 4.5\%$  (95%CI, 3.8%-5.2%).

**Supplementary Table 2. Characteristics of patients with discordant and concordant 30-day mortality risk categories based on CAPE<sup>®</sup> and PSI in the prospective dataset.**

| Variable                               | Discordant CAPE <sup>®</sup> and PSI                  |                                                       | Concordant CAPE <sup>®</sup> and PSI                  |                                                        |
|----------------------------------------|-------------------------------------------------------|-------------------------------------------------------|-------------------------------------------------------|--------------------------------------------------------|
|                                        | CAPE <sup>®</sup> >0.20 risk, PSI <0.20 risk<br>n= 69 | CAPE <sup>®</sup> <0.20 risk, PSI >0.20 risk<br>n= 36 | CAPE <sup>®</sup> >0.20 risk, PSI >0.20 risk<br>n= 63 | CAPE <sup>®</sup> <0.20 risk, PSI <0.20 risk<br>n= 147 |
| 30-day mortality                       | 17 (24.6)                                             | 10 (27.8)                                             | 30 (47.6)                                             | 4 (2.7)                                                |
| Age, years                             | 77.6 ± 13.0                                           | 78.8 ± 11.7                                           | 80.3 ± 9.1                                            | 62.8 ± 20.2                                            |
| Male                                   | 35 (50.7)                                             | 19 (52.8)                                             | 44 (69.8)                                             | 81 (55.1)                                              |
| BMI <sup>a</sup>                       | 21.2 ± 5.1                                            | 22.0 ± 3.70                                           | 19.7 ± 3.9                                            | 25.4 ± 6.9                                             |
| Smoking <sup>b</sup>                   |                                                       |                                                       |                                                       |                                                        |
| - Never                                | 37 (77.1)                                             | 19 (79.2)                                             | 28 (73.7)                                             | 93 (77.5)                                              |
| - Former                               | 4 (8.3)                                               | 2 (8.3)                                               | 4 (10.5)                                              | 19 (12.9)                                              |
| - Current                              | 7 (14.6)                                              | 3 (12.5)                                              | 6 (15.8)                                              | 8 (5.4)                                                |
| Residing in long-term care facility    | 16 (23.2)                                             | 15 (41.7)                                             | 26 (41.3)                                             | 6 (4.1)                                                |
| Hospitalisation in prior 30 days       | 25 (36.2)                                             | 6 (16.7)                                              | 19 (30.2)                                             | 19 (12.9)                                              |
| Antibiotic therapy in prior 30 days    | 21 (30.9)                                             | 6 (16.7)                                              | 20 (31.8)                                             | 24 (16.3)                                              |
| <b>Comorbid chronic diseases</b>       |                                                       |                                                       |                                                       |                                                        |
| - Diabetes Mellitus                    | 21 (30.4)                                             | 16 (44.4)                                             | 28 (44.4)                                             | 45 (30.6)                                              |
| - Hypertension                         | 46 (66.7)                                             | 26 (72.2)                                             | 46 (73.0)                                             | 72 (49.0)                                              |
| - Ischaemic heart disease              | 21 (30.4)                                             | 15 (41.7)                                             | 24 (38.1)                                             | 26 (17.7)                                              |
| - Congestive cardiac failure           | 3 (4.4)                                               | 5 (13.9)                                              | 3 (4.8)                                               | 6 (4.1)                                                |
| - Asthma                               | 3 (4.4)                                               | 2 (5.6)                                               | 4 (6.4)                                               | 13 (8.8)                                               |
| - Chronic obstructive lung disease     | 22 (7.0)                                              | 1 (2.8)                                               | 5 (7.9)                                               | 11 (7.5)                                               |
| - Bronchiectasis                       | 7 (10.1)                                              | 0 (0.0)                                               | 5 (7.9)                                               | 10 (6.8)                                               |
| - Dementia                             | 24 (34.8)                                             | 14 (38.9)                                             | 23 (36.5)                                             | 24 (16.3)                                              |
| - Parkinson's disease                  | 11 (15.9)                                             | 0 (0.0)                                               | 4 (6.4)                                               | 8 (5.4)                                                |
| - Chronic kidney disease               | 8 (11.6)                                              | 13 (36.1)                                             | 18 (28.6)                                             | 9 (6.1)                                                |
| - Chronic liver disease                | 3 (4.4)                                               | 3 (8.3)                                               | 2 (3.2)                                               | 3 (2.0)                                                |
| - Active cancers                       | 2 (2.9)                                               | 6 (16.7)                                              | 21 (33.3)                                             | 5 (3.4)                                                |
| <b>Vital signs on admission</b>        |                                                       |                                                       |                                                       |                                                        |
| - Fever ≥ 38.0 °C                      | 44 (63.8)                                             | 20 (55.6)                                             | 41 (65.1)                                             | 86 (58.5)                                              |
| - Heart rate/minute                    | 94.9 ± 21.5                                           | 95.3 (22.0)                                           | 105.1 (28.1)                                          | 94.8 (19.6)                                            |
| - Respiratory rate/minute              | 21.6 ± 4.2                                            | 20.7 ± 3.8                                            | 24.8 ± 7.6                                            | 19.8 ± 3.2                                             |
| - Systolic blood pressure (mmHg)       | 127.3 ± 20.6                                          | 135.2 ± 36.3                                          | 122.3 ± 31.6                                          | 135.0 ± 23.4                                           |
| - Diastolic blood pressure (mmHg)      | 70.2 ± 13.0                                           | 70.3 ± 14.9                                           | 68.8 ± 16.4                                           | 74.8 ± 13.3                                            |
| - Pulse capillary oxygenation (%)      | 94.5 ± 4.5                                            | 93.8 ± 5.5                                            | 92.6 ± 6.9                                            | 96.5 ± 4.3                                             |
| - Fraction of inspired oxygen required | 32.5 ± 21.9                                           | 28.4 ± 18.2                                           | 41.3 ± 29.6                                           | 23.8 ± 11.5                                            |
| <b>Respiratory symptoms</b>            |                                                       |                                                       |                                                       |                                                        |
| - Cough                                | 44 (63.8)                                             | 18 (50.0)                                             | 26 (41.3)                                             | 90 (61.2)                                              |
| - Dyspnea                              | 34 (49.3)                                             | 12 (33.3)                                             | 33 (52.4)                                             | 51 (34.7)                                              |
| - Sputum                               | 19 (27.5)                                             | 7 (19.4)                                              | 17 (27.0)                                             | 37 (25.2)                                              |
| - Haemoptysis                          | 0 (0.0)                                               | 0 (0.0)                                               | 0 (0.0)                                               | 4 (2.7)                                                |
| - Rhinorrhea                           | 0 (0.0)                                               | 1 (2.8)                                               | 0 (0.0)                                               | 10 (6.8)                                               |
| - Throat pain                          | 0 (0.0)                                               | 1 (2.8)                                               | 1 (1.6)                                               | 14 (9.5)                                               |
| - Chest pain                           | 8 (11.6)                                              | 3 (8.3)                                               | 3 (4.8)                                               | 17 (11.6)                                              |
| - Wheeze                               | 1 (1.5)                                               | 0 (0.0)                                               | 1 (1.6)                                               | 0 (0.0)                                                |
| - Myalgia                              | 1 (1.5)                                               | 0 (0.0)                                               | 0 (0.0)                                               | 9 (6.1)                                                |
| - Lethargy                             | 11 (15.9)                                             | 5 (13.9)                                              | 15 (23.8)                                             | 12 (8.2)                                               |
| - Fall                                 | 5 (7.3)                                               | 1 (2.8)                                               | 5 (7.9)                                               | 9 (6.1)                                                |
| - Nausea or vomiting                   | 2 (2.9)                                               | 4 (11.1)                                              | 6 (9.5)                                               | 16 (10.9)                                              |
| <b>Pneumonia complications</b>         |                                                       |                                                       |                                                       |                                                        |
| - Acute myocardial injury              | 3 (4.4)                                               | 6 (16.7)                                              | 11 (17.7)                                             | 2 (1.4)                                                |
| - Acute kidney injury                  | 16 (23.2)                                             | 13 (36.1)                                             | 33 (53.2)                                             | 11 (7.5)                                               |
| - Delirium                             | 3 (4.4)                                               | 6 (16.7)                                              | 13 (20.6)                                             | 4 (2.7)                                                |
| - Critical care admission              | 4 (5.8)                                               | 2 (5.6)                                               | 4 (6.3)                                               | 2 (1.4)                                                |
| <b>Laboratory Indices</b>              |                                                       |                                                       |                                                       |                                                        |
| - Serum C-reactive Protein (mg/L)      | 71.7 ± 63.8                                           | 88.6 ± 96.9                                           | 97.0 ± 103.7                                          | 49.8 ± 60.4                                            |
| - Serum Procalcitonin (ug/L)           | 2.4 (12.3)                                            | 4.8 (15.2)                                            | 8.3 (23.5)                                            | 1.1 (3.5)                                              |
| - White cell count (cells/uL)          | 69 (11.9)                                             | 36 (15.2)                                             | 16.4 (28.7)                                           | 11.0 (4.8)                                             |

Data are presented as number (%), mean ± standard deviation, median [interquartile range]. CAPE<sup>®</sup>= Community-acquired pneumonia artificial intelligence predictive engine. <sup>a</sup>Data missing for 102 subjects. <sup>b</sup>Data missing for 85 subjects.
